# Supplementary material for: Energy Consumption vs. Tensile Strength of Poly[methyl methacrylate] in Material Extrusion 3D Printing: The Impact of Six Control Settings
Source: MDPI journal article supplement (doi:10.3390/polym15040845), 2023-02-08
Supplement: s1 [file s1]

# Energy Consumption vs. Tensile Strength of Poly[methyl methacrylate] in Material Extrusion 3D Printing: The Impact of Six Control Settings

Nectarios Vidakis <sup>1</sup>, Markos Petousis <sup>1,\*</sup>, Nikolaos Mountakis <sup>1</sup>, Amalia Moutsopoulou <sup>1</sup> and Emmanuel Karapidakis <sup>2</sup>

<sup>1</sup> Department of Mechanical Engineering, Hellenic Mediterranean University, 71410 Heraklion, Greece

<sup>2</sup> Electrical and Computer Engineering Department, Hellenic Mediterranean University, 71410 Heraklion, Greece

\* Correspondence: markospetousis@hmu.gr; Tel.: +30-281-037-9227

**Abstract:** The energy efficiency of material extrusion additive manufacturing has a significant impact on the economics and environmental footprint of the process. Control parameters that ensure 3D-printed functional products of premium quality and mechanical strength are an established market-driven requirement. To accomplish multiple objectives is challenging, especially for multi-purpose industrial polymers, such as the Poly[methyl methacrylate]. The current paper explores the contribution of six generic control factors (infill density, raster deposition angle, nozzle temperature, print speed, layer thickness, and bed temperature) to the energy performance of Poly[methyl methacrylate] over its mechanical performance. A five-level L25 Taguchi orthogonal array was composed, with five replicas, involving 135 experiments. The 3D printing time and the electrical consumption were documented with the stopwatch approach. The tensile strength, modulus, and toughness were experimentally obtained. The raster deposition angle and the printing speed were the first and second most influential control parameters on tensile strength. Layer thickness and printing speed were the corresponding ones for the energy consumption. Quadratic regression model equations for each response metric over the six control parameters were compiled and validated. Thus, the best compromise between energy efficiency and mechanical strength is achievable, and a tool creates significant value for engineering applications.

**Citation:** Vidakis, N.; Petousis, M.; Mountakis, N.; Moutsopoulou, A.; Karapidakis, E. Energy Consumption vs. Tensile Strength of Poly[methyl methacrylate] in Material Extrusion 3D Printing: The Impact of Six Control Settings. *Polymers* **2023**, *15*, 845. <https://doi.org/10.3390/polym15040845>

Academic Editor: Filippo Berto

Received: 23 January 2023

Revised: 5 February 2023

Accepted: 6 February 2023

Published: 8 February 2023

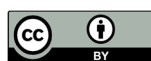

**Copyright:** © 2023 by the authors. Licensee MDPI, Basel, Switzerland. This article is an open access article distributed under the terms and conditions of the Creative Commons Attribution (CC BY) license (<https://creativecommons.org/licenses/by/4.0/>).

**Keywords:** Poly[methyl methacrylate] (PMMA); optimization; material extrusion (MEX); energy consumption; energy efficiency; compressive strength; taguchi analysis; robust design

## 3. Results

### 3.2. DOE and experimental results

**Table S1.** Measured Weight, Tensile Strength, Tensile Modulus of Elasticity and Tensile Toughness for each experimental run and five replicas per run.

| A/A | Run | Weight (g) | sB (MPa) | E (MPa) | Toughness (MJ/m <sup>3</sup> ) |
|-----|-----|------------|----------|---------|--------------------------------|
| 1   | 1   | 1.255      | 36.65    | 183.90  | 6.32                           |
| 2   |     | 1.149      | 43.62    | 184.33  | 8.86                           |
| 3   |     | 1.178      | 41.30    | 190.58  | 7.25                           |
| 4   |     | 1.149      | 42.13    | 185.36  | 7.88                           |
| 5   |     | 1.164      | 40.54    | 178.65  | 8.43                           |
| 6   | 2   | 1.196      | 33.15    | 173.18  | 4.30                           |
| 7   |     | 1.239      | 26.86    | 159.74  | 2.96                           |
| 8   |     | 1.239      | 33.59    | 176.40  | 4.07                           |
| 9   |     | 1.215      | 31.35    | 175.00  | 3.48                           |
| 10  |     | 1.220      | 31.28    | 178.03  | 3.60                           |
| 11  | 3   | 1.182      | 21.97    | 148.50  | 1.79                           |
| 12  |     | 1.201      | 23.10    | 149.70  | 1.78                           |
| 13  |     | 1.167      | 18.63    | 129.72  | 1.37                           |
| 14  |     | 1.196      | 21.42    | 144.22  | 1.62                           |
| 15  |     | 1.191      | 20.88    | 145.67  | 1.60                           |
| 16  | 4   | 1.120      | 13.18    | 101.68  | 0.74                           |
| 17  |     | 1.124      | 15.80    | 118.43  | 0.87                           |
| 18  |     | 1.105      | 16.53    | 122.34  | 0.95                           |
| 19  |     | 1.096      | 16.02    | 108.39  | 0.78                           |
| 20  |     | 1.115      | 14.59    | 112.27  | 0.89                           |
| 21  | 5   | 1.034      | 10.58    | 78.69   | 0.77                           |
| 22  |     | 1.006      | 14.40    | 102.11  | 1.11                           |
| 23  |     | 1.063      | 17.97    | 120.70  | 1.40                           |
| 24  |     | 1.097      | 15.97    | 88.45   | 1.16                           |
| 25  |     | 1.054      | 15.73    | 99.38   | 1.03                           |
| 26  | 6   | 0.915      | 29.77    | 126.54  | 4.94                           |
| 27  |     | 0.891      | 25.53    | 121.00  | 3.13                           |
| 28  |     | 0.877      | 27.20    | 124.52  | 4.40                           |
| 29  |     | 0.930      | 28.19    | 129.53  | 3.79                           |
| 30  |     | 0.901      | 27.07    | 119.52  | 4.25                           |
| 31  | 7   | 0.862      | 11.71    | 68.46   | 1.17                           |
| 32  |     | 0.872      | 13.44    | 75.16   | 1.54                           |
| 33  |     | 0.862      | 11.37    | 75.60   | 1.08                           |
| 34  |     | 0.867      | 12.37    | 71.49   | 1.31                           |
| 35  |     | 0.862      | 11.68    | 77.74   | 1.24                           |
| 36  | 8   | 1.359      | 30.35    | 192.17  | 2.60                           |
| 37  |     | 1.349      | 27.19    | 201.03  | 2.10                           |
| 38  |     | 1.378      | 25.03    | 181.83  | 1.91                           |
| 39  |     | 1.368      | 26.44    | 198.13  | 2.11                           |
| 40  |     | 1.368      | 27.96    | 192.04  | 2.20                           |
| 41  | 9   | 1.511      | 31.66    | 224.96  | 2.66                           |
| 42  |     | 1.511      | 33.57    | 208.44  | 2.76                           |
| 43  |     | 1.506      | 39.64    | 235.17  | 3.77                           |

|    |    |       |       |        |      |
|----|----|-------|-------|--------|------|
| 44 |    | 1.501 | 36.77 | 209.49 | 2.89 |
| 45 |    | 1.506 | 36.58 | 229.41 | 2.88 |
| 46 |    | 0.700 | 9.92  | 53.62  | 1.25 |
| 47 |    | 0.734 | 7.05  | 41.76  | 0.88 |
| 48 | 10 | 0.782 | 8.94  | 51.49  | 1.07 |
| 49 |    | 0.820 | 8.90  | 52.07  | 1.13 |
| 50 |    | 0.782 | 8.74  | 51.97  | 1.13 |
| 51 |    | 0.990 | 32.23 | 175.72 | 3.86 |
| 52 |    | 0.985 | 33.11 | 181.64 | 3.56 |
| 53 | 11 | 1.000 | 33.10 | 184.58 | 3.48 |
| 54 |    | 1.005 | 32.81 | 179.04 | 3.93 |
| 55 |    | 1.000 | 32.68 | 187.82 | 3.74 |
| 56 |    | 1.404 | 44.80 | 224.60 | 5.77 |
| 57 |    | 1.433 | 44.51 | 223.60 | 5.29 |
| 58 | 12 | 1.433 | 43.54 | 222.82 | 5.18 |
| 59 |    | 1.409 | 44.13 | 224.82 | 5.32 |
| 60 |    | 1.419 | 44.20 | 222.51 | 5.72 |
| 61 |    | 1.252 | 25.17 | 163.85 | 1.95 |
| 62 |    | 1.257 | 22.72 | 150.20 | 1.92 |
| 63 | 13 | 1.262 | 26.95 | 171.45 | 2.39 |
| 64 |    | 1.266 | 25.51 | 157.35 | 1.94 |
| 65 |    | 1.262 | 24.63 | 143.92 | 1.92 |
| 66 |    | 0.582 | 5.92  | 21.10  | 0.40 |
| 67 |    | 0.640 | 5.75  | 20.15  | 0.39 |
| 68 | 14 | 0.606 | 7.83  | 30.71  | 0.47 |
| 69 |    | 0.592 | 6.41  | 25.42  | 0.40 |
| 70 |    | 0.602 | 6.73  | 22.60  | 0.42 |
| 71 |    | 1.098 | 8.45  | 90.59  | 0.39 |
| 72 |    | 1.088 | 9.64  | 118.27 | 0.50 |
| 73 | 15 | 1.055 | 8.09  | 80.63  | 0.54 |
| 74 |    | 1.059 | 8.79  | 100.00 | 0.45 |
| 75 |    | 1.079 | 8.41  | 99.58  | 0.49 |
| 76 |    | 1.102 | 27.71 | 142.48 | 3.49 |
| 77 |    | 1.135 | 28.66 | 149.07 | 3.40 |
| 78 | 16 | 1.178 | 27.81 | 142.00 | 3.45 |
| 79 |    | 1.164 | 27.88 | 149.99 | 3.69 |
| 80 |    | 1.130 | 27.82 | 152.07 | 3.51 |
| 81 |    | 1.454 | 35.97 | 214.49 | 3.76 |
| 82 |    | 1.492 | 36.13 | 207.85 | 3.48 |
| 83 | 17 | 1.483 | 40.92 | 214.98 | 5.70 |
| 84 |    | 1.464 | 37.10 | 223.01 | 3.88 |
| 85 |    | 1.478 | 38.83 | 212.63 | 4.71 |
| 86 | 18 | 0.822 | 9.80  | 50.15  | 1.48 |
| 87 |    | 0.774 | 9.93  | 50.69  | 1.55 |

|          |    |       |       |        |      |
|----------|----|-------|-------|--------|------|
| 88       |    | 0.750 | 11.48 | 54.26  | 1.75 |
| 89       |    | 0.755 | 10.51 | 52.63  | 1.54 |
| 90       |    | 0.789 | 10.68 | 53.13  | 1.48 |
| 91       |    | 0.797 | 7.06  | 50.13  | 0.76 |
| 92       |    | 0.811 | 7.73  | 59.11  | 0.71 |
| 93       | 19 | 0.854 | 7.12  | 56.96  | 0.67 |
| 94       |    | 0.835 | 7.47  | 53.54  | 0.71 |
| 95       |    | 0.816 | 7.17  | 55.91  | 0.71 |
| 96       |    | 1.320 | 22.10 | 145.48 | 1.70 |
| 97       |    | 1.373 | 17.05 | 134.30 | 1.20 |
| 98       | 20 | 1.344 | 25.69 | 167.04 | 2.10 |
| 99       |    | 1.344 | 23.56 | 150.15 | 1.74 |
| 100      |    | 1.335 | 19.89 | 145.61 | 1.84 |
| 101      |    | 1.132 | 32.23 | 183.25 | 3.77 |
| 102      |    | 1.122 | 32.09 | 177.46 | 3.66 |
| 103      | 21 | 1.122 | 33.54 | 169.16 | 4.73 |
| 104      |    | 1.103 | 32.67 | 187.03 | 3.99 |
| 105      |    | 1.117 | 32.53 | 173.48 | 4.17 |
| 106      |    | 1.150 | 36.26 | 149.67 | 7.28 |
| 107      |    | 1.059 | 36.53 | 136.94 | 7.83 |
| 108      | 22 | 1.069 | 34.75 | 144.62 | 5.63 |
| 109      |    | 1.121 | 35.58 | 134.86 | 6.27 |
| 110      |    | 1.117 | 35.92 | 146.11 | 6.90 |
| 111      |    | 1.494 | 23.23 | 126.26 | 2.89 |
| 112      |    | 1.547 | 36.59 | 184.92 | 5.52 |
| 113      | 23 | 1.590 | 27.81 | 174.41 | 3.01 |
| 114      |    | 1.571 | 26.59 | 153.57 | 3.19 |
| 115      |    | 1.561 | 27.66 | 168.13 | 3.47 |
| 116      |    | 1.505 | 20.33 | 172.72 | 1.37 |
| 117      |    | 1.433 | 20.16 | 164.36 | 1.37 |
| 118      | 24 | 1.404 | 22.58 | 160.29 | 1.83 |
| 119      |    | 1.423 | 20.56 | 166.47 | 1.63 |
| 120      |    | 1.442 | 21.18 | 165.62 | 1.49 |
| 121      |    | 1.183 | 16.70 | 162.42 | 0.58 |
| 122      |    | 1.250 | 13.56 | 127.47 | 0.49 |
| 123      | 25 | 1.270 | 15.52 | 163.35 | 0.55 |
| 124      |    | 1.270 | 15.34 | 145.70 | 0.52 |
| 125      |    | 1.236 | 15.59 | 146.89 | 0.55 |
| Min:     |    | 0.582 | 5.75  | 20.15  | 0.39 |
| Max:     |    | 1.590 | 44.80 | 235.17 | 8.86 |
| Average: |    | 1.141 | 23.62 | 138.91 | 2.68 |

**Table S2.** Measured for Printing Time, EPC, SPE, SPP for each experimental run and five replicas per run.

| A/A | Run | Printing Time (s) | EPC (MJ) | SPE (MJ/g) | SPP (kW/g) |
|-----|-----|-------------------|----------|------------|------------|
| 1   | 1   | 1546              | 0.457    | 0.364      | 0.236      |
| 2   |     | 1453              | 0.428    | 0.373      | 0.257      |
| 3   |     | 1501              | 0.436    | 0.370      | 0.246      |
| 4   |     | 1612              | 0.482    | 0.420      | 0.260      |
| 5   |     | 1499              | 0.472    | 0.405      | 0.270      |
| 6   | 2   | 642               | 0.284    | 0.238      | 0.370      |
| 7   |     | 692               | 0.238    | 0.192      | 0.277      |
| 8   |     | 668               | 0.241    | 0.195      | 0.291      |
| 9   |     | 723               | 0.241    | 0.199      | 0.275      |
| 10  |     | 699               | 0.238    | 0.195      | 0.279      |
| 11  | 3   | 471               | 0.148    | 0.125      | 0.265      |
| 12  |     | 494               | 0.144    | 0.120      | 0.243      |
| 13  |     | 477               | 0.137    | 0.117      | 0.246      |
| 14  |     | 444               | 0.137    | 0.114      | 0.258      |
| 15  |     | 466               | 0.140    | 0.118      | 0.253      |
| 16  | 4   | 394               | 0.104    | 0.093      | 0.237      |
| 17  |     | 402               | 0.119    | 0.106      | 0.263      |
| 18  |     | 357               | 0.112    | 0.101      | 0.283      |
| 19  |     | 346               | 0.076    | 0.069      | 0.199      |
| 20  |     | 378               | 0.119    | 0.107      | 0.282      |
| 21  | 5   | 247               | 0.162    | 0.157      | 0.634      |
| 22  |     | 255               | 0.086    | 0.086      | 0.337      |
| 23  |     | 252               | 0.108    | 0.102      | 0.403      |
| 24  |     | 269               | 0.083    | 0.075      | 0.281      |
| 25  |     | 250               | 0.104    | 0.099      | 0.396      |
| 26  | 6   | 365               | 0.119    | 0.130      | 0.356      |
| 27  |     | 387               | 0.126    | 0.141      | 0.365      |
| 28  |     | 363               | 0.140    | 0.160      | 0.441      |
| 29  |     | 371               | 0.122    | 0.132      | 0.355      |
| 30  |     | 375               | 0.133    | 0.148      | 0.394      |
| 31  | 7   | 348               | 0.079    | 0.092      | 0.264      |
| 32  |     | 364               | 0.094    | 0.107      | 0.295      |
| 33  |     | 297               | 0.104    | 0.121      | 0.408      |
| 34  |     | 298               | 0.076    | 0.087      | 0.293      |
| 35  |     | 327               | 0.083    | 0.096      | 0.294      |
| 36  | 8   | 718               | 0.238    | 0.175      | 0.244      |
| 37  |     | 632               | 0.248    | 0.184      | 0.291      |
| 38  |     | 708               | 0.281    | 0.204      | 0.288      |
| 39  |     | 678               | 0.227    | 0.166      | 0.245      |
| 40  |     | 694               | 0.230    | 0.168      | 0.243      |
| 41  | 9   | 1264              | 0.331    | 0.219      | 0.173      |
| 42  |     | 1337              | 0.360    | 0.238      | 0.178      |

|    |    |      |       |       |       |
|----|----|------|-------|-------|-------|
| 43 |    | 1111 | 0.317 | 0.210 | 0.189 |
| 44 |    | 1181 | 0.356 | 0.237 | 0.201 |
| 45 |    | 1184 | 0.335 | 0.222 | 0.188 |
| 46 |    | 611  | 0.227 | 0.324 | 0.530 |
| 47 |    | 587  | 0.227 | 0.309 | 0.526 |
| 48 | 10 | 584  | 0.230 | 0.295 | 0.505 |
| 49 |    | 582  | 0.216 | 0.263 | 0.453 |
| 50 |    | 594  | 0.227 | 0.290 | 0.488 |
| 51 |    | 449  | 0.191 | 0.193 | 0.429 |
| 52 |    | 420  | 0.187 | 0.190 | 0.453 |
| 53 | 11 | 444  | 0.202 | 0.202 | 0.454 |
| 54 |    | 410  | 0.158 | 0.158 | 0.384 |
| 55 |    | 428  | 0.191 | 0.191 | 0.446 |
| 56 |    | 951  | 0.306 | 0.218 | 0.229 |
| 57 |    | 915  | 0.302 | 0.211 | 0.231 |
| 58 | 12 | 895  | 0.356 | 0.249 | 0.278 |
| 59 |    | 889  | 0.302 | 0.215 | 0.241 |
| 60 |    | 907  | 0.313 | 0.221 | 0.243 |
| 61 |    | 526  | 0.130 | 0.104 | 0.197 |
| 62 |    | 516  | 0.151 | 0.120 | 0.233 |
| 63 | 13 | 523  | 0.144 | 0.114 | 0.218 |
| 64 |    | 547  | 0.169 | 0.134 | 0.244 |
| 65 |    | 522  | 0.151 | 0.120 | 0.230 |
| 66 |    | 345  | 0.148 | 0.254 | 0.735 |
| 67 |    | 373  | 0.158 | 0.248 | 0.664 |
| 68 | 14 | 351  | 0.162 | 0.267 | 0.762 |
| 69 |    | 362  | 0.180 | 0.304 | 0.840 |
| 70 |    | 358  | 0.166 | 0.275 | 0.768 |
| 71 |    | 826  | 0.353 | 0.321 | 0.389 |
| 72 |    | 838  | 0.288 | 0.265 | 0.316 |
| 73 | 15 | 817  | 0.274 | 0.259 | 0.317 |
| 74 |    | 836  | 0.346 | 0.326 | 0.390 |
| 75 |    | 854  | 0.313 | 0.290 | 0.340 |
| 76 |    | 483  | 0.191 | 0.173 | 0.358 |
| 77 |    | 437  | 0.191 | 0.168 | 0.385 |
| 78 | 16 | 478  | 0.284 | 0.241 | 0.505 |
| 79 |    | 471  | 0.212 | 0.182 | 0.387 |
| 80 |    | 443  | 0.202 | 0.178 | 0.403 |
| 81 |    | 951  | 0.371 | 0.255 | 0.268 |
| 82 |    | 979  | 0.360 | 0.241 | 0.246 |
| 83 | 17 | 1022 | 0.338 | 0.228 | 0.223 |
| 84 |    | 1007 | 0.338 | 0.231 | 0.230 |
| 85 |    | 1022 | 0.392 | 0.265 | 0.260 |
| 86 | 18 | 653  | 0.227 | 0.276 | 0.423 |

|          |    |        |       |       |       |
|----------|----|--------|-------|-------|-------|
| 87       |    | 650    | 0.194 | 0.251 | 0.386 |
| 88       |    | 681    | 0.248 | 0.331 | 0.486 |
| 89       |    | 702    | 0.288 | 0.381 | 0.543 |
| 90       |    | 658    | 0.234 | 0.297 | 0.451 |
| 91       |    | 430    | 0.115 | 0.145 | 0.336 |
| 92       |    | 427    | 0.148 | 0.182 | 0.426 |
| 93       | 19 | 417    | 0.140 | 0.164 | 0.394 |
| 94       |    | 420    | 0.173 | 0.207 | 0.493 |
| 95       |    | 446    | 0.158 | 0.194 | 0.435 |
| 96       |    | 767    | 0.324 | 0.245 | 0.320 |
| 97       |    | 778    | 0.356 | 0.260 | 0.334 |
| 98       | 20 | 821    | 0.274 | 0.204 | 0.248 |
| 99       |    | 820    | 0.256 | 0.190 | 0.232 |
| 100      |    | 825    | 0.281 | 0.210 | 0.255 |
| 101      |    | 441    | 0.108 | 0.095 | 0.216 |
| 102      |    | 411    | 0.133 | 0.119 | 0.289 |
| 103      | 21 | 421    | 0.112 | 0.099 | 0.236 |
| 104      |    | 449    | 0.112 | 0.101 | 0.225 |
| 105      |    | 456    | 0.112 | 0.100 | 0.219 |
| 106      |    | 314    | 0.097 | 0.085 | 0.269 |
| 107      |    | 328    | 0.137 | 0.129 | 0.394 |
| 108      | 22 | 341    | 0.119 | 0.111 | 0.326 |
| 109      |    | 364    | 0.097 | 0.087 | 0.238 |
| 110      |    | 310    | 0.108 | 0.097 | 0.312 |
| 111      |    | 936    | 0.428 | 0.287 | 0.306 |
| 112      |    | 899    | 0.374 | 0.242 | 0.269 |
| 113      | 23 | 742    | 0.270 | 0.170 | 0.229 |
| 114      |    | 682    | 0.421 | 0.268 | 0.393 |
| 115      |    | 801    | 0.353 | 0.226 | 0.282 |
| 116      |    | 1303   | 0.464 | 0.309 | 0.237 |
| 117      |    | 1352   | 0.446 | 0.312 | 0.230 |
| 118      | 24 | 1340   | 0.414 | 0.295 | 0.220 |
| 119      |    | 1300   | 0.443 | 0.311 | 0.239 |
| 120      |    | 1274   | 0.432 | 0.300 | 0.235 |
| 121      |    | 721    | 0.198 | 0.167 | 0.232 |
| 122      |    | 713    | 0.198 | 0.158 | 0.222 |
| 123      | 25 | 668    | 0.216 | 0.170 | 0.255 |
| 124      |    | 662    | 0.230 | 0.181 | 0.274 |
| 125      |    | 692    | 0.216 | 0.175 | 0.253 |
| Min:     |    | 247    | 0.076 | 0.069 | 0.173 |
| Max:     |    | 1612   | 0.482 | 0.420 | 0.840 |
| Average: |    | 660.06 | 0.229 | 0.200 | 0.330 |

### 3.3. Statistical analysis

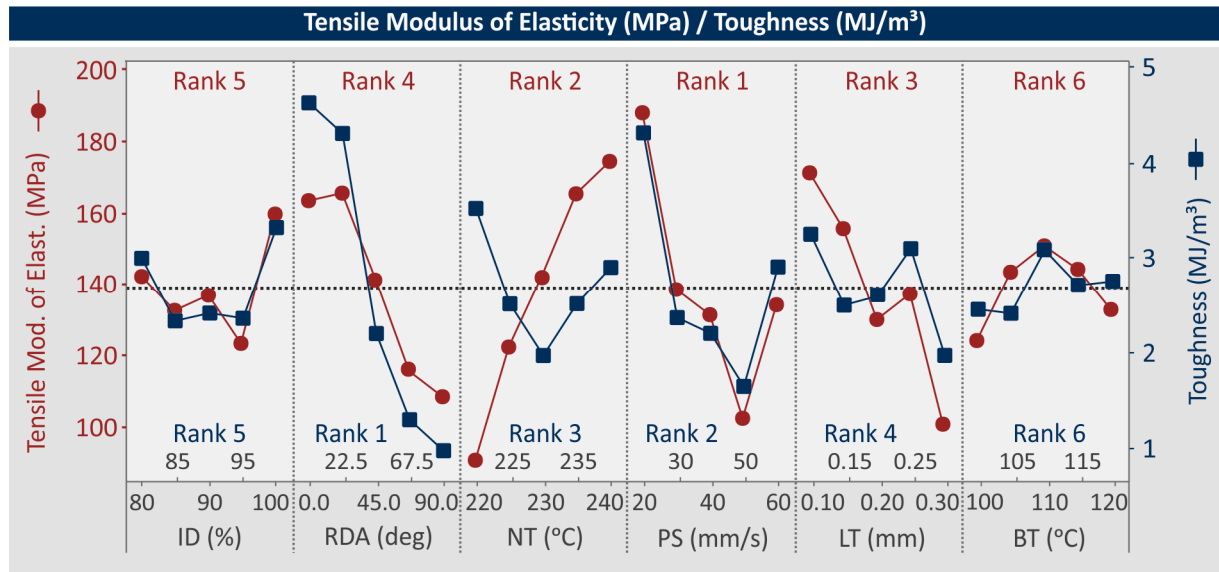

**Figure S1.** MEP: tensile modulus of elasticity (MPa), tensile toughness (MJ/m<sup>3</sup>)

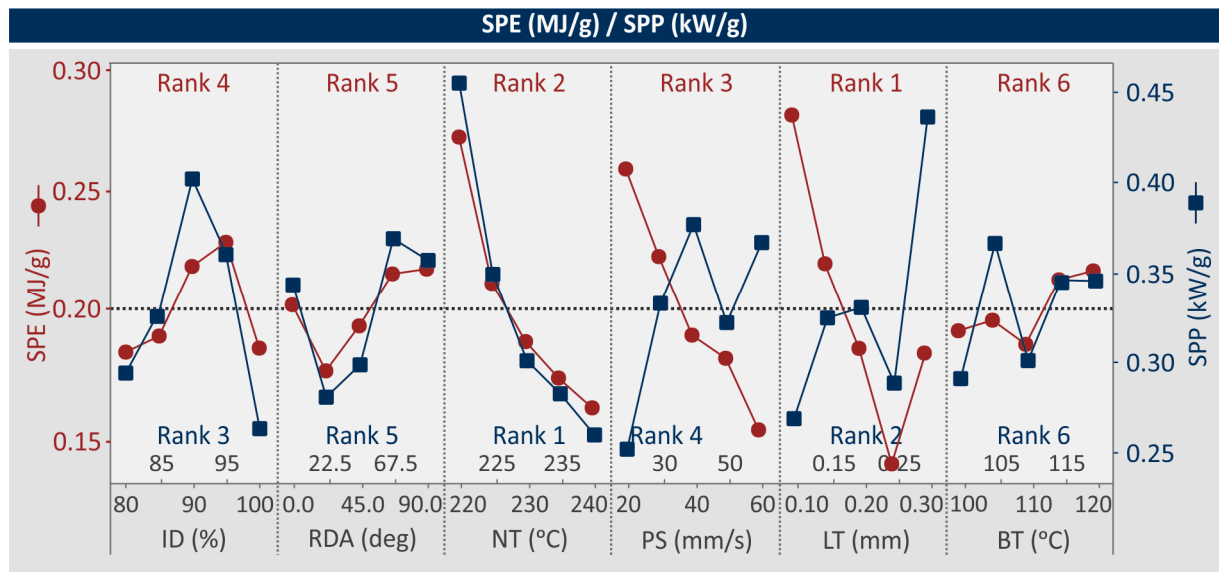

**Figure S2.** MEP: SPE (MJ/g), SPP (kW/g)



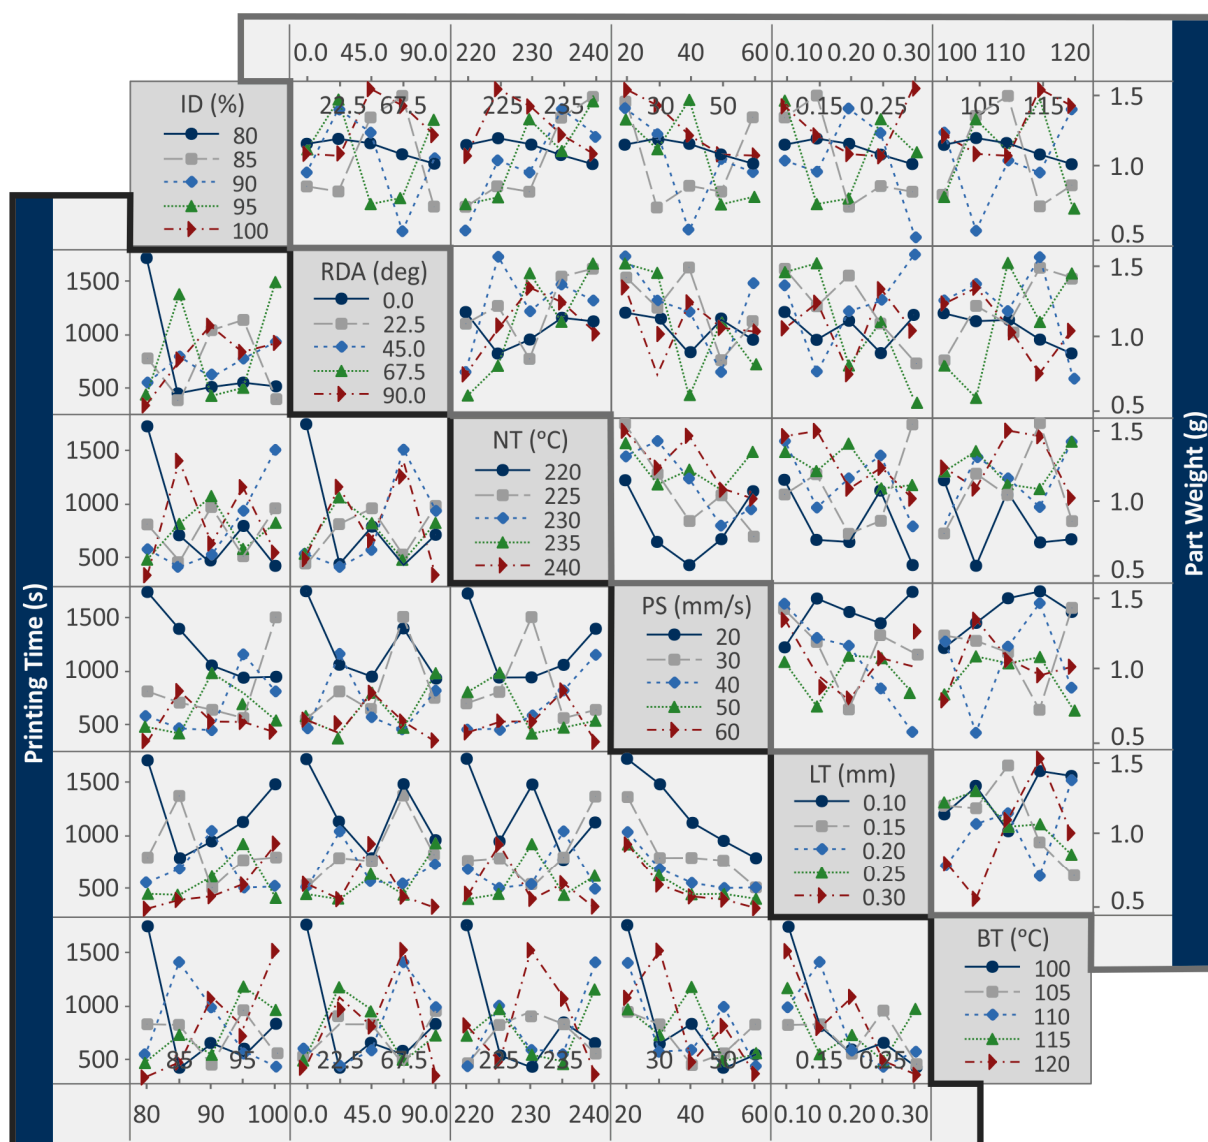

Figure S3. Interaction plots: printing time (s), part weight (g)

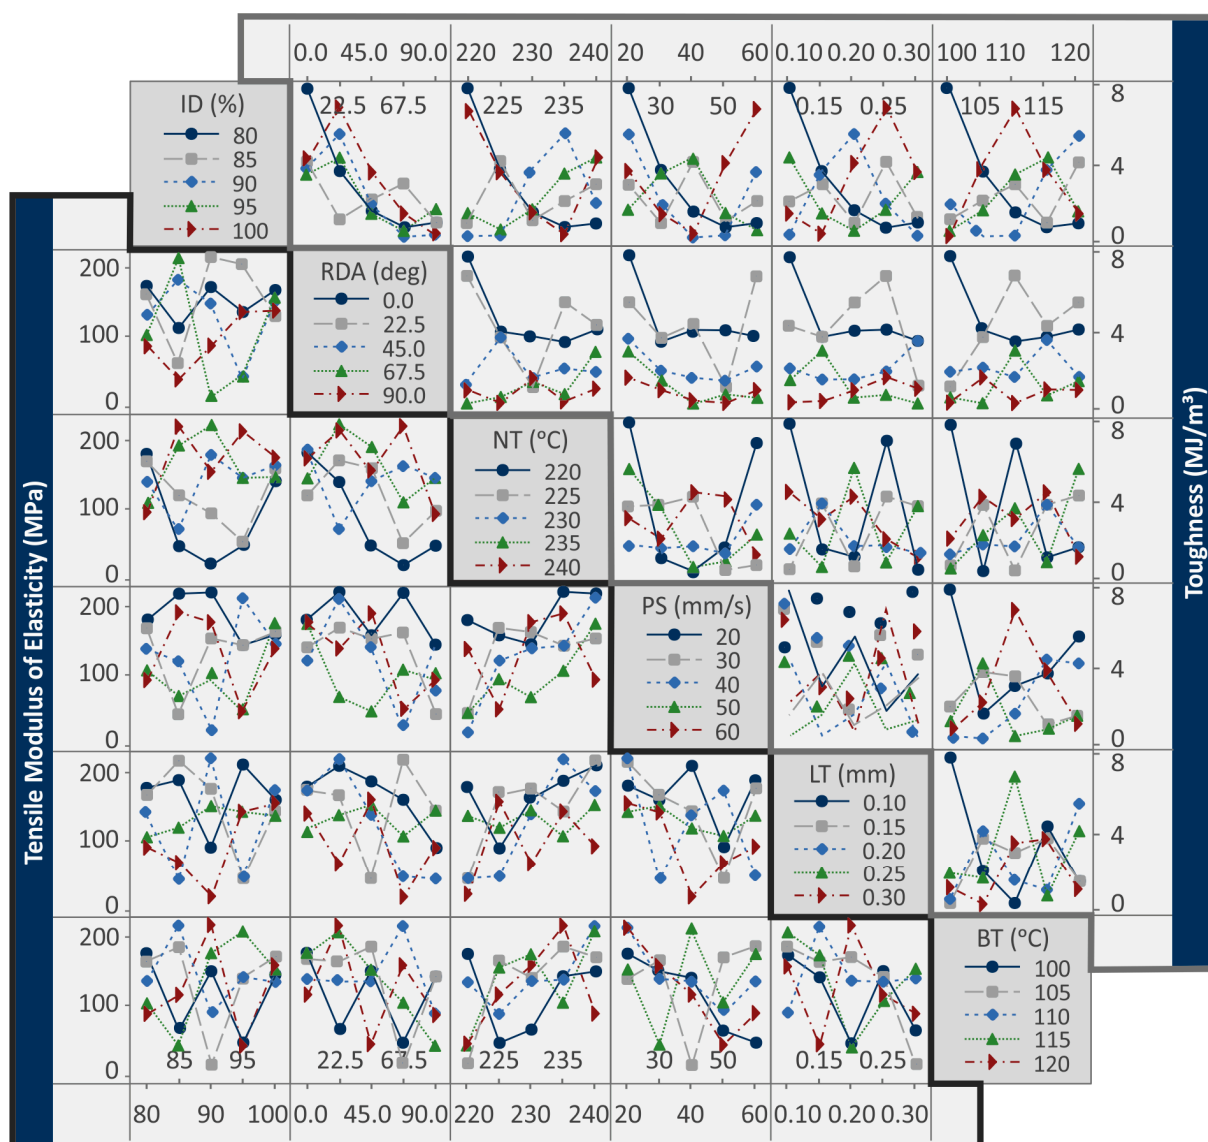

**Figure S4.** Interaction plots: tensile modulus of elasticity (MPa), tensile toughness (MJ/m<sup>3</sup>)

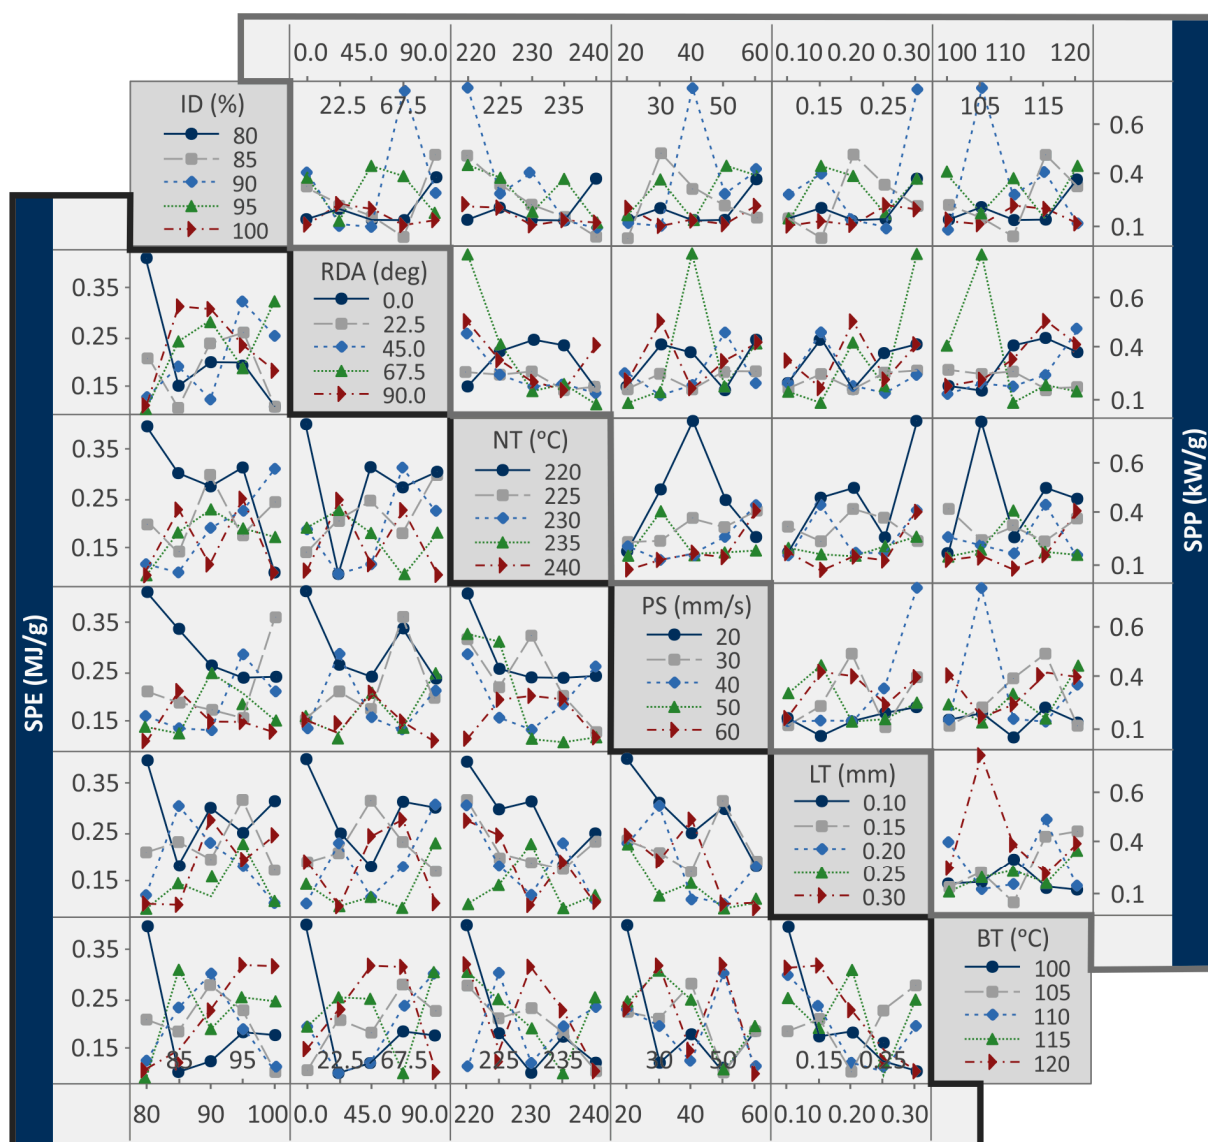

**Figure S5.** Interaction plots: SPE (MJ/g), SPP (kW/g)

### 3.4. Regression analysis

**Table S3.** Polynomial ANOVA, E vs ID, RDA, NT, PS, LT, BT.

| Source           | DF | Adj SS | Adj MS  | F-Value | P-Value |
|------------------|----|--------|---------|---------|---------|
| Regression       | 12 | 348540 | 29045.0 | 89.73   | 0.000   |
| ID               | 1  | 9348   | 9347.7  | 28.88   | 0.000   |
| RDA              | 1  | 2004   | 2003.6  | 6.19    | 0.014   |
| NT               | 1  | 3911   | 3910.7  | 12.08   | 0.001   |
| PS               | 1  | 47806  | 47805.6 | 147.69  | 0.000   |
| LT               | 1  | 642    | 641.8   | 1.98    | 0.162   |
| BT               | 1  | 10148  | 10147.9 | 31.35   | 0.000   |
| ID <sup>2</sup>  | 1  | 9614   | 9614.5  | 29.70   | 0.000   |
| RDA <sup>2</sup> | 1  | 752    | 751.7   | 2.32    | 0.130   |
| NT <sup>2</sup>  | 1  | 3397   | 3397.1  | 10.50   | 0.002   |
| PS <sup>2</sup>  | 1  | 35142  | 35141.8 | 108.57  | 0.000   |

|                       |        |        |         |       |       |
|-----------------------|--------|--------|---------|-------|-------|
| LT <sup>2</sup>       | 1      | 134    | 134.4   | 0.42  | 0.521 |
| BT <sup>2</sup>       | 1      | 9998   | 9997.6  | 30.89 | 0.000 |
| Error                 | 112    | 36253  | 323.7   |       |       |
| Total                 | 124    | 384793 | 29368.7 |       |       |
| R <sup>2</sup>        | 90.58% |        |         |       |       |
| R <sup>2</sup> (adj)  | 89.57% |        |         |       |       |
| R <sup>2</sup> (pred) | 88.22% |        |         |       |       |

$$E = -8103 - 37.23 \times ID - 0.444 \times RDA + 61.5 \times NT - 9.451 \times PS - 219 \times LT + 47.40 \times BT + 0.2096 \times ID^2 - 0.00289 \times RDA^2 - 0.1246 \times NT^2 + 0.10020 \times PS^2 - 248 \times LT^2 - 0.2138 \times BT^2 \quad (S1)$$

**Table S4.** Polynomial ANOVA, Toughness vs ID, RDA, NT, PS, LT, BT.

| Source                | DF     | Adj SS  | Adj MS  | F-Value | P-Value |
|-----------------------|--------|---------|---------|---------|---------|
| Regression            | 12     | 424.274 | 35.3562 | 56.35   | 0.000   |
| ID                    | 1      | 16.770  | 16.7701 | 26.73   | 0.000   |
| RDA                   | 1      | 38.002  | 38.0020 | 60.57   | 0.000   |
| NT                    | 1      | 26.839  | 26.8391 | 42.78   | 0.000   |
| PS                    | 1      | 76.565  | 76.5647 | 122.03  | 0.000   |
| LT                    | 1      | 0.001   | 0.0013  | 0.00    | 0.964   |
| BT                    | 1      | 1.430   | 1.4297  | 2.28    | 0.134   |
| ID <sup>2</sup>       | 1      | 17.065  | 17.0651 | 27.20   | 0.000   |
| RDA <sup>2</sup>      | 1      | 2.620   | 2.6197  | 4.18    | 0.043   |
| NT <sup>2</sup>       | 1      | 26.579  | 26.5795 | 42.36   | 0.000   |
| PS <sup>2</sup>       | 1      | 64.273  | 64.2731 | 102.44  | 0.000   |
| LT <sup>2</sup>       | 1      | 0.176   | 0.1756  | 0.28    | 0.598   |
| BT <sup>2</sup>       | 1      | 1.342   | 1.3418  | 2.14    | 0.146   |
| Error                 | 112    | 70.269  | 0.6274  |         |         |
| Total                 | 124    | 494.543 | 35.9836 |         |         |
| R <sup>2</sup>        | 85.79% |         |         |         |         |
| R <sup>2</sup> (adj)  | 84.27% |         |         |         |         |
| R <sup>2</sup> (pred) | 82.08% |         |         |         |         |

$$\text{Toughness} = 639.3 - 1.577 \times ID - 0.06109 \times RDA - 5.096 \times NT - 0.3782 \times PS - 0.31 \times LT + 0.563 \times BT + 0.00883 \times ID^2 + 0.000171 \times RDA^2 + 0.01102 \times NT^2 + 0.004285 \times PS^2 - 9.0 \times LT^2 - 0.00248 \times BT^2 \quad (S2)$$

**Table S5.** Polynomial ANOVA, SPE vs ID, RDA, NT, PS, LT, BT.

| Source     | DF | Adj SS   | Adj MS   | F-Value | P-Value |
|------------|----|----------|----------|---------|---------|
| Regression | 12 | 0.710921 | 0.059243 | 62.02   | 0.000   |
| ID         | 1  | 0.027352 | 0.027352 | 28.63   | 0.000   |
| RDA        | 1  | 0.002293 | 0.002293 | 2.40    | 0.124   |
| NT         | 1  | 0.021942 | 0.021942 | 22.97   | 0.000   |
| PS         | 1  | 0.012143 | 0.012143 | 12.71   | 0.001   |
| LT         | 1  | 0.110442 | 0.110442 | 115.62  | 0.000   |

|                       |        |          |          |       |       |
|-----------------------|--------|----------|----------|-------|-------|
| BT                    | 1      | 0.002001 | 0.002001 | 2.09  | 0.151 |
| ID <sup>2</sup>       | 1      | 0.026635 | 0.026635 | 27.88 | 0.000 |
| RDA <sup>2</sup>      | 1      | 0.006938 | 0.006938 | 7.26  | 0.008 |
| NT <sup>2</sup>       | 1      | 0.020370 | 0.020370 | 21.32 | 0.000 |
| PS <sup>2</sup>       | 1      | 0.002542 | 0.002542 | 2.66  | 0.106 |
| LT <sup>2</sup>       | 1      | 0.072472 | 0.072472 | 75.87 | 0.000 |
| BT <sup>2</sup>       | 1      | 0.002267 | 0.002267 | 2.37  | 0.126 |
| Error                 | 112    | 0.106989 | 0.000955 |       |       |
| Total                 | 124    | 0.817910 | 0.060198 |       |       |
| R <sup>2</sup>        | 86.92% |          |          |       |       |
| R <sup>2</sup> (adj)  | 85.52% |          |          |       |       |
| R <sup>2</sup> (pred) | 83.64% |          |          |       |       |

$$\begin{aligned} \text{SPE} = & 16.20 + 0.0637 \times \text{ID} - 0.000475 \times \text{RDA} - 0.1457 \times \text{NT} - 0.00476 \times \text{PS} - 2.873 \times \text{LT} \\ & - 0.0210 \times \text{BT} - 0.000349 \times \text{ID}^2 + 0.000009 \times \text{RDA}^2 + 0.000305 \times \text{NT}^2 \\ & + 0.000027 \times \text{PS}^2 + 5.756 \times \text{LT}^2 + 0.000102 \times \text{BT}^2 \end{aligned} \quad (\text{S3})$$

**Table S6.** Polynomial ANOVA, SPP vs ID, RDA, NT, PS, LT, BT.

| Source                | DF     | Adj SS  | Adj MS   | F-Value | P-Value |
|-----------------------|--------|---------|----------|---------|---------|
| Regression            | 12     | 1.36387 | 0.113656 | 19.57   | 0.000   |
| ID                    | 1      | 0.25149 | 0.251490 | 43.31   | 0.000   |
| RDA                   | 1      | 0.02083 | 0.020835 | 3.59    | 0.061   |
| NT                    | 1      | 0.07384 | 0.073843 | 12.72   | 0.001   |
| PS                    | 1      | 0.07698 | 0.076977 | 13.26   | 0.000   |
| LT                    | 1      | 0.01191 | 0.011909 | 2.05    | 0.155   |
| BT                    | 1      | 0.00347 | 0.003467 | 0.60    | 0.441   |
| ID <sup>2</sup>       | 1      | 0.25313 | 0.253129 | 43.59   | 0.000   |
| RDA <sup>2</sup>      | 1      | 0.04188 | 0.041876 | 7.21    | 0.008   |
| NT <sup>2</sup>       | 1      | 0.06892 | 0.068921 | 11.87   | 0.001   |
| PS <sup>2</sup>       | 1      | 0.05266 | 0.052664 | 9.07    | 0.003   |
| LT <sup>2</sup>       | 1      | 0.03241 | 0.032406 | 5.58    | 0.020   |
| BT <sup>2</sup>       | 1      | 0.00304 | 0.003036 | 0.52    | 0.471   |
| Error                 | 112    | 0.65034 | 0.005807 |         |         |
| Total                 | 124    | 2.01421 | 0.119463 |         |         |
| R <sup>2</sup>        | 67.71% |         |          |         |         |
| R <sup>2</sup> (adj)  | 64.25% |         |          |         |         |
| R <sup>2</sup> (pred) | 59.30% |         |          |         |         |

$$\begin{aligned} \text{SPP} = & 21.61 + 0.1931 \times \text{ID} - 0.001430 \times \text{RDA} - 0.2673 \times \text{NT} + 0.01199 \times \text{PS} - 0.943 \times \text{LT} \\ & + 0.0277 \times \text{BT} - 0.001076 \times \text{ID}^2 + 0.000022 \times \text{RDA}^2 + 0.000561 \times \text{NT}^2 \\ & - 0.000123 \times \text{PS}^2 + 3.85 \times \text{LT}^2 - 0.000118 \times \text{BT}^2 \end{aligned} \quad (\text{S4})$$

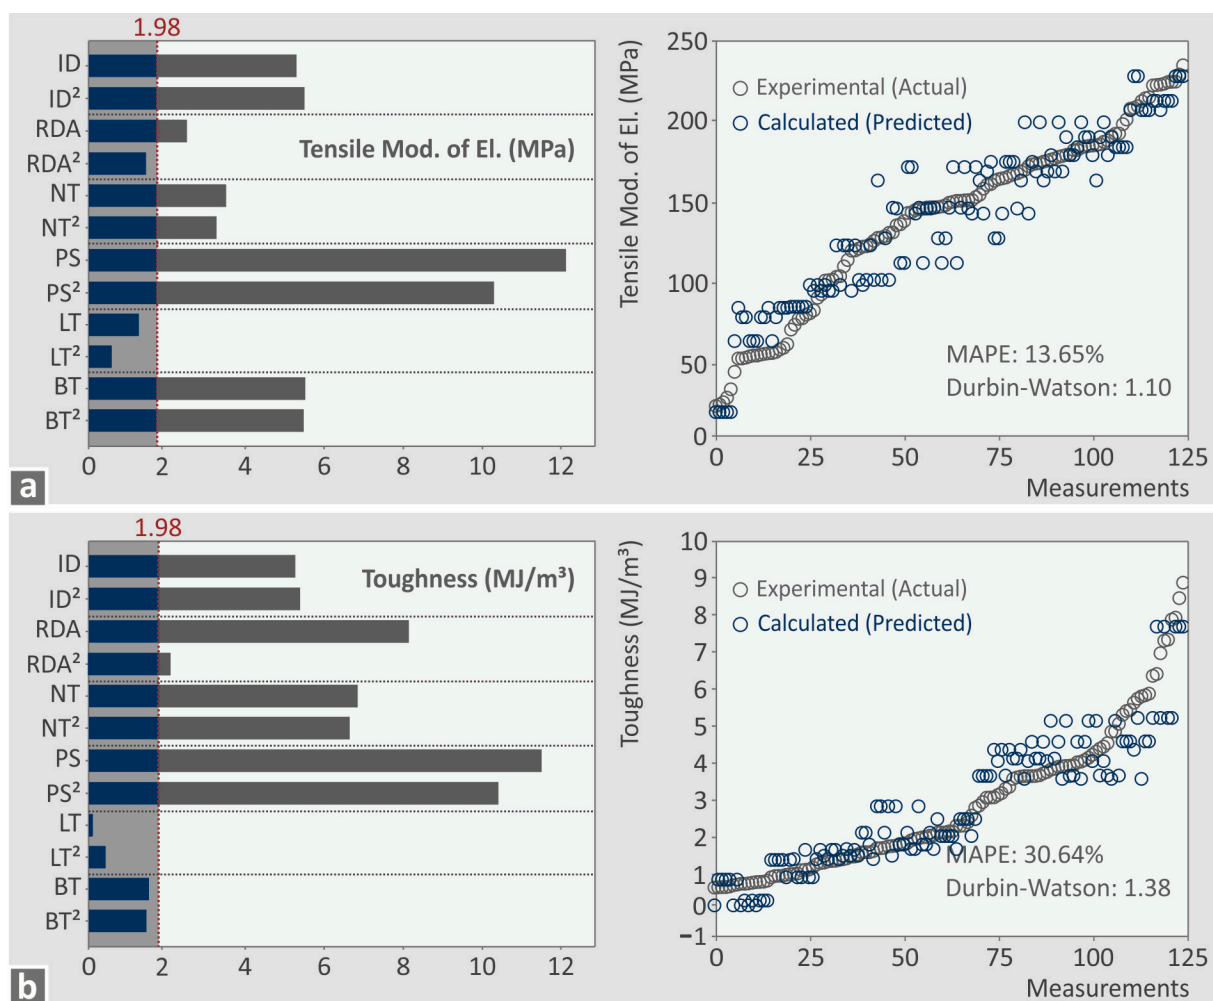

**Figure S6.** Pareto and experimental vs calculated charts: (a) tensile modulus of elasticity (MPa), (b) tensile toughness (MJ/m<sup>3</sup>)

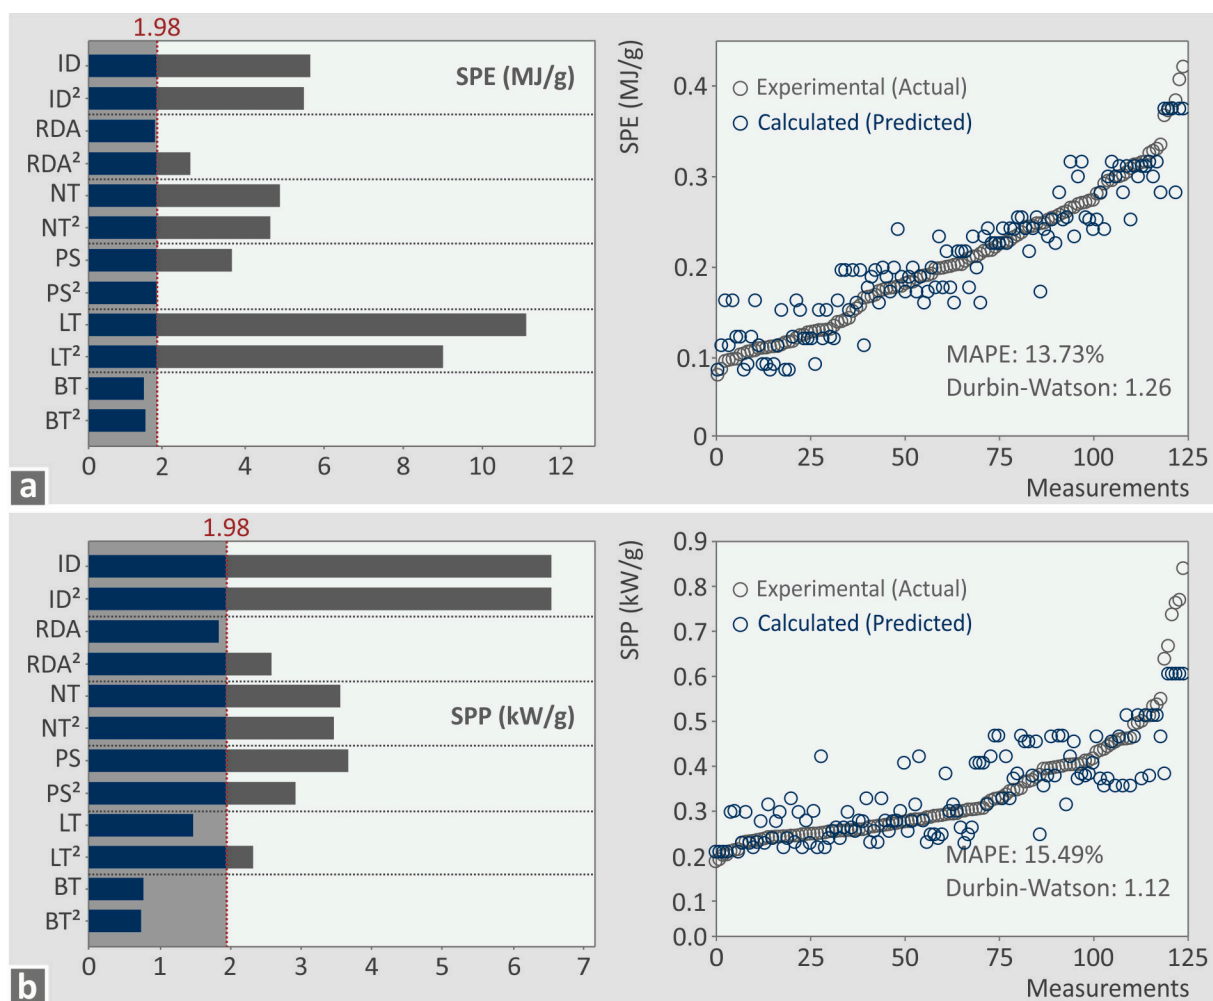

**Figure S7.** Pareto and experimental vs calculated charts: (a) SPE (MJ/g), (b) SPP (kW/g)

### 3.5. Confirmation run

**Table S7.** Measured Weight, Tensile Strength, Tensile Modulus of Elasticity and Tensile Toughness for each experimental run and five replicas per run for the Confirmation Runs.

| A/A | Run      | Weight (g) | sB (MPa) | E (MPa) | Toughness (MJ/m³) |
|-----|----------|------------|----------|---------|-------------------|
| 1   | 26       | 2.088      | 65.52    | 248.44  | 8.30              |
| 2   |          | 2.087      | 66.81    | 255.81  | 9.06              |
| 3   |          | 1.992      | 64.68    | 253.09  | 8.49              |
| 4   |          | 2.077      | 62.34    | 272.42  | 8.44              |
| 5   |          | 2.182      | 65.95    | 270.27  | 8.82              |
| 6   | 27       | 0.868      | 28.79    | 179.51  | 3.84              |
| 7   |          | 0.875      | 27.81    | 194.98  | 3.83              |
| 8   |          | 0.850      | 28.96    | 189.95  | 3.89              |
| 9   |          | 0.855      | 27.54    | 190.25  | 4.00              |
| 10  |          | 0.837      | 27.91    | 187.62  | 3.86              |
|     | Min:     | 0.837      | 27.54    | 179.51  | 3.83              |
|     | Max:     | 2.182      | 66.81    | 272.42  | 9.06              |
|     | Average: | 1.471      | 46.63    | 224.23  | 6.25              |

**Table S8.** Measured Printing Time, EPC, SPE, SPP for each experimental run and five replicas per run for the Confirmation Runs.

| A/A      | Run | Printing Time (s) | EPC (MJ) | SPE (MJ/g) | SPP (kW/g) |
|----------|-----|-------------------|----------|------------|------------|
| 1        | 26  | 1172              | 0.633    | 0.303      | 0.259      |
| 2        |     | 1230              | 0.589    | 0.282      | 0.229      |
| 3        |     | 1244              | 0.638    | 0.320      | 0.258      |
| 4        |     | 1278              | 0.564    | 0.271      | 0.212      |
| 5        |     | 1174              | 0.574    | 0.263      | 0.224      |
| 6        | 27  | 302               | 0.082    | 0.094      | 0.312      |
| 7        |     | 282               | 0.068    | 0.078      | 0.277      |
| 8        |     | 297               | 0.065    | 0.077      | 0.259      |
| 9        |     | 307               | 0.068    | 0.079      | 0.257      |
| 10       |     | 288               | 0.061    | 0.073      | 0.253      |
| Min:     |     | 282               | 0.061    | 0.073      | 0.212      |
| Max:     |     | 1278              | 0.638    | 0.320      | 0.312      |
| Average: |     | 757.40            | 0.334    | 0.184      | 0.254      |
